# Supplementary material for: Wound-Healing and Skin-Moisturizing Effects of Sasa veitchii Extract
Source: MDPI journal article supplement (doi:10.3390/healthcare9060761), 2021-06-19
Supplement: s1 [file s1]

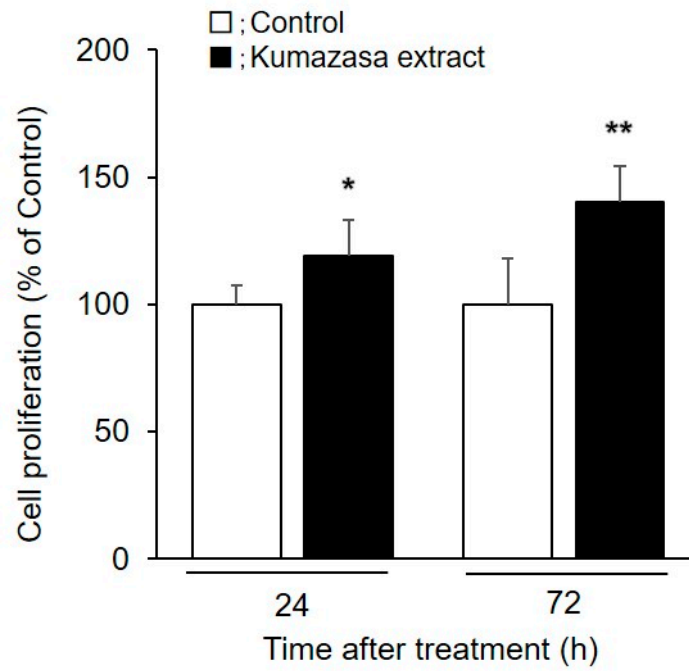

**Figure S1. Effects of Kumazasa extract on cell proliferation in HaCaT cells.** HaCaT cells were plated and incubated for 24 h or 72 h after the addition of Kumazasa extract (1000 µg/mL). Cell proliferation was analyzed by the WST-1 assay. The mean value of the control cells is expressed as 100% (mean ± SD, n=6, \*:  $p < 0.05$ , \*\*:  $p < 0.01$  vs control cells)
